# Supplementary material for: Efficient solar cells with enhanced humidity and heat stability based on benzylammonium–caesium–formamidinium mixed-dimensional perovskites
Source: Royal Society of Chemistry journal article supplement (doi:10.1039/c8ta04936j), 2018-01-01
Supplement: c8ta04936j1.pdf [file c8ta04936j1.pdf]

## Supporting Information

### Efficient Solar Cells with Enhanced Humidity and Heat Stability Based on Benzylammonium-caesium-formamidinium Mixed-Dimensional Perovskites

Guozhen Liu,<sup>ab</sup> Haiying Zheng,<sup>ab</sup> Xiaoxiao Xu,<sup>ab</sup> Liangzheng Zhu,<sup>ab</sup> Ahmed Alsaedi,<sup>c</sup> Tasawar

Hayat,<sup>ce</sup> Xu Pan<sup>\*a</sup> and Songyuan Dai<sup>\*acd</sup>

<sup>a</sup>Key Laboratory of Photovoltaic and Energy Conservation Materials, Institute of Applied Technology, Hefei Institutes of Physical Science, Chinese Academy of Sciences, Hefei 230031, China.

<sup>b</sup>University of Science and Technology of China, Hefei 230026, China.

<sup>c</sup>NAAM Research Group, Department of Mathematics, Faculty of Science, King Abdulaziz University, Jeddah 21589, Saudi Arabia.

<sup>d</sup>State Key Laboratory of Alternate Electrical Power System with Renewable Energy Sources, North China Electric Power University, Beijing 102206, China.

<sup>e</sup>Department of Mathematics, Quaid-I-Azam University, Islamabad 44000, Pakistan.

\*Email: xpan@rntek.cas.cn

## Experimental Section

### Preparation of perovskite precursor

*HC(NH<sub>2</sub>)<sub>2</sub>I (FAI) and HC(NH<sub>2</sub>)<sub>2</sub>Br (FABr) synthesis:* FAI and FABr were prepared by dissolving formamidine acetate (98%, Sinopharm) in the excess of hydroiodic acid (HI, 57 wt% in H<sub>2</sub>O, sigma-aldrich) and hydrobromic acid (HBr, 47 wt% in H<sub>2</sub>O, sigma-aldrich) in a flask, respectively. After addition of HI or HBr, the solution was stirred at 0 °C for about 2 h. By rotary evaporation for 2 h at 60 °C, two white powders were obtained, respectively. After drying, the powders were recrystallized in diethyl ether. Finally, the purified FAI and FABr were gained by drying in a vacuum oven at 60 °C.

*C<sub>6</sub>H<sub>5</sub>CH<sub>2</sub>NH<sub>3</sub>I (BEI) synthesis:* BEI was obtained by reacting hydroiodic acid (HI, 57 wt%) with benzylamine (BE, 98.5%, Sinopharm) for about 1 h, the other preparation steps were same as the above.

*Preparation of MD perovskite precursor solution:* The [(BE<sub>2</sub>PbI<sub>4</sub>)<sub>x</sub>(FA<sub>0.9</sub>Cs<sub>0.1</sub>PbI<sub>3</sub>)<sub>1-x</sub>]<sub>0.85</sub>(FAPbBr<sub>3</sub>)<sub>0.15</sub> precursor solutions (1.35 M Pb<sup>2+</sup>) were obtained by dissolving corresponding lead iodide (PbI<sub>2</sub>, TCI), lead bromide (PbBr<sub>2</sub>, TCI), FAI, FABr, BEI and caesium iodide (CsI, Alfa) in mixed solvent of anhydrous methyl sulfoxide (DMSO, Sinopharm) and anhydrous N,N-dimethylformamide (DMF, Sinopharm) (DMSO:DMF=1:4 by volume) with stoichiometrically. MAPbI<sub>3</sub> perovskite solution (1.35 M Pb<sup>2+</sup>) was composed of corresponding lead iodide (PbI<sub>2</sub>, TCI) and methylammonium iodide CH<sub>3</sub>NH<sub>3</sub>I (MAI, ≥99.5%, Xi'an p-OLED Corp.) in mixed solvent of anhydrous methyl sulfoxide (DMSO, Sinopharm) and anhydrous N, N-dimethylformamide (DMF, Sinopharm) (DMSO: DMF=4:1 by volume). Then, all the solutions were stirred for 1 h at 65 °C and filtered using 0.45 μm PVDF filters before film deposition.

*Device fabrication:* All of the perovskite devices were deposited on pretreated FTO substrate. The

compact layer of TiO<sub>2</sub> was coated by a spray pyrolysis method at 430 °C. The solution was gained by mixing the bis(acetylacetonate) (0.4 mL, Sinopharm, 99%) and titanium diisopropoxide (0.6 mL, Aldrich, 97%) in anhydrous isopropanol (7 mL, Sinopharm, 99.7%). Then, the mesoporous layer of TiO<sub>2</sub> was deposited by spin-coating the TiO<sub>2</sub> paste (30 nm, Dyesol, TiO<sub>2</sub>: anhydrous ethanol =1:5.5 by weight) at 4000 r.p.m for 20 s and heated at 500 °C for 30 min. The perovskite layers were spin-coated on the mesoporous layer in the glovebox at 1100 r.p.m for 10 s and 4600 r.p.m for 35 s. Chlorobenzene (120 µL) was drop-added on the surface during the spin coating step 15 s before the end. Then, the substrate should be annealed for 50 min at 105 °C. The HTM solution, composing of 73-mg spiro-OMeTAD, 29-µL 4-tert-butylpyridine, 17-µL Li<sup>+</sup> salt and 8-µL cobalt(III) salt in 1-mL chlorobenzene, was then spin-coated on the perovskite at 3000 r.p.m for 20 s. Finally, about 65-nm Au electrode was thermally evaporated under high vacuum.

*Characterizations:* XRD patterns were characterized using a Smartlab 9KW with the 2θ range from 5° to 50°. SEM images were recorded on a high-resolution field-emission scanning electron microscope (FE-SEM, sirion200, FEI Corp., Holland). Ultraviolet-visible absorption spectra were characterized by ultraviolet-vis (UV-vis) spectrophotometer (U-3900H, HITACHI, Japan) with the measurement from 300 nm to 900 nm. Steady-state Photoluminescence (PL) spectra were measured by the spectrofluorometer (photon technology international). They were analyzed by a software Fluorescence. The samples were excited with a standard 450 W xenon CW lamp with an exciting wavelength of 473 nm. *J-V* curves were measured by a solar simulator (Newport, Oriel Class A, 91195A) at 100 mW/cm<sup>2</sup> illumination AM 1.5G with an active area of 0.09 cm<sup>2</sup>. The scan rate is 50 mV s<sup>-1</sup>. The source meter is Keithley 2420. Incident photon to current conversion efficiency (IPCE) spectra (300 nm to 900 nm) were executed on dual Xenon/quartz halogen light source (PV

Measurements, Inc.) in DC mode without bias light. Transient absorption (TA) were performed by the spectra LKS (Applied photophysics). The laser energy was  $150 \mu\text{J}/\text{cm}^2$  with a repetition rate of 5 Hz. The samples were tested under a 760-nm probe light wavelength and a 500-nm laser light wavelength. The construction of sample is glass/perovskite film.

*Stability test:* The perovskite devices were placed in a containers with  $50\pm 5\%$  RH to measure the humidity stability at room temperature in dark. Heat stability measurement was executed in a container at  $85^\circ\text{C}$  in dark. All perovskite devices were aged under the same conditions.

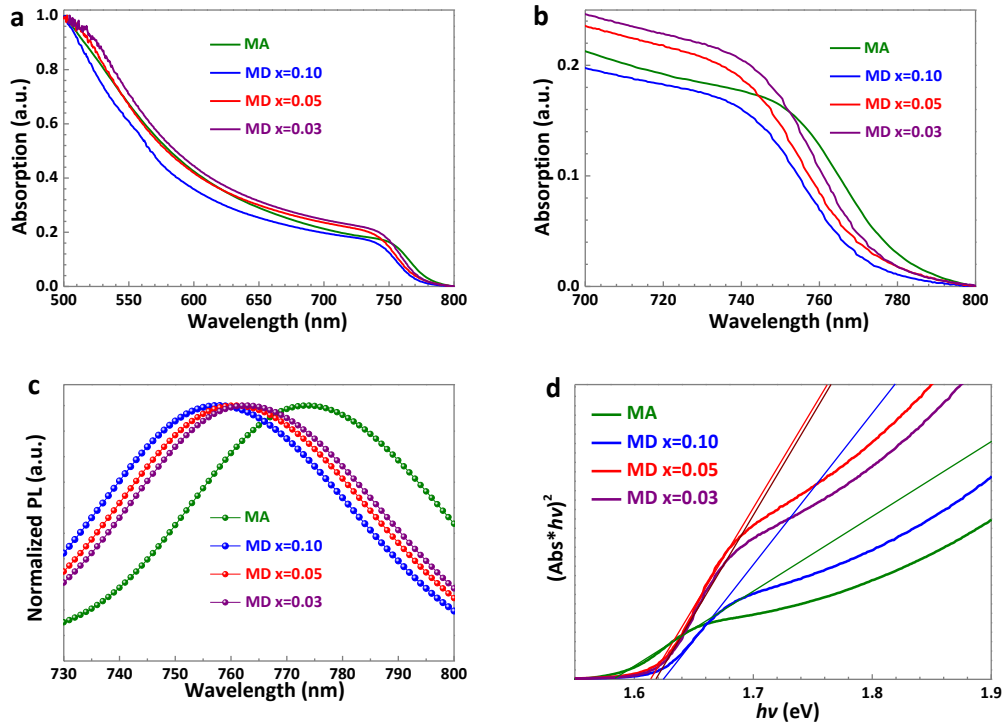

**Fig. S1.** (a) Normalized UV-vis absorption spectra, (b) partially enlarged normalized UV-vis absorption spectra and (c) partially enlarged normalized PL spectra of MAPbI<sub>3</sub> and [(BE<sub>2</sub>PbI<sub>4</sub>)<sub>x</sub>(FA<sub>0.9</sub>Cs<sub>0.1</sub>PbI<sub>3</sub>)<sub>1-x</sub>]<sub>0.85</sub>(FAPbBr<sub>3</sub>)<sub>0.15</sub> (x=0.03, 0.05, 0.10) thin films. (d) Tauc plot from the UV-vis spectra of MAPbI<sub>3</sub> and [(BE<sub>2</sub>PbI<sub>4</sub>)<sub>x</sub>(FA<sub>0.9</sub>Cs<sub>0.1</sub>PbI<sub>3</sub>)<sub>1-x</sub>]<sub>0.85</sub>(FAPbBr<sub>3</sub>)<sub>0.15</sub> (x=0.03, 0.05, 0.10) films.

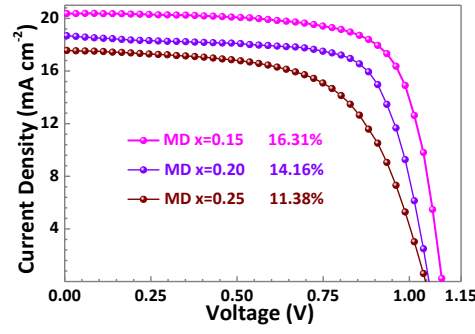

**Fig. S2.**  $J$ – $V$  curves of  $[(\text{BE}_2\text{PbI}_4)_x(\text{FA}_{0.9}\text{CS}_{0.1}\text{PbI}_3)_{1-x}]_{0.85}(\text{FAPbBr}_3)_{0.15}$  ( $x=0.15, 0.20, 0.25$ ) PSCs.

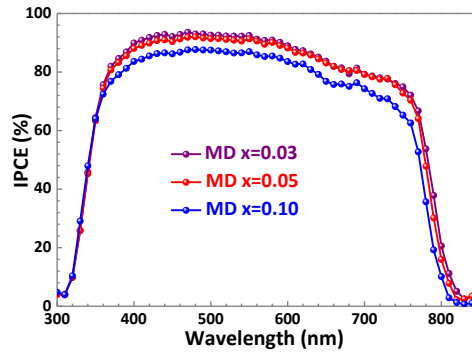

**Fig. S3.** IPCE spectra of the MD ( $x=0.03, 0.05$  and  $0.10$ ) perovskite devices.

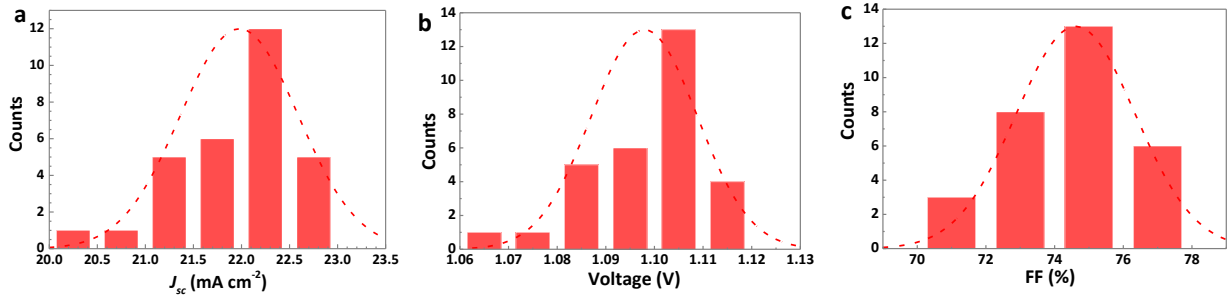

**Fig. S4.** (a) Short-circuit current density ( $J_{sc}$ ), (b) Open circuit voltages ( $V_{oc}$ ) and (c) Fill factor (FF) histogram fitted with a Gaussian distribution of the MD ( $x=0.05$ ) perovskite devices over 30 measured devices.

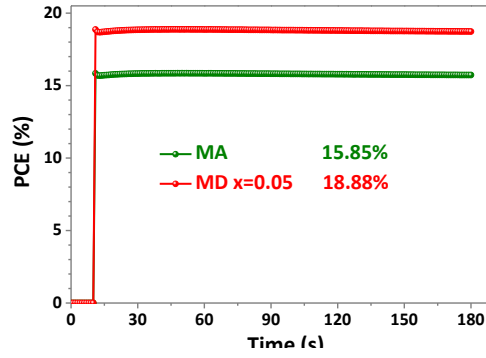

**Fig. S5.** Stabilized power output at maximum power point as a function of time for the best performing MAPbI<sub>3</sub> and MD (x=0.05) devices.

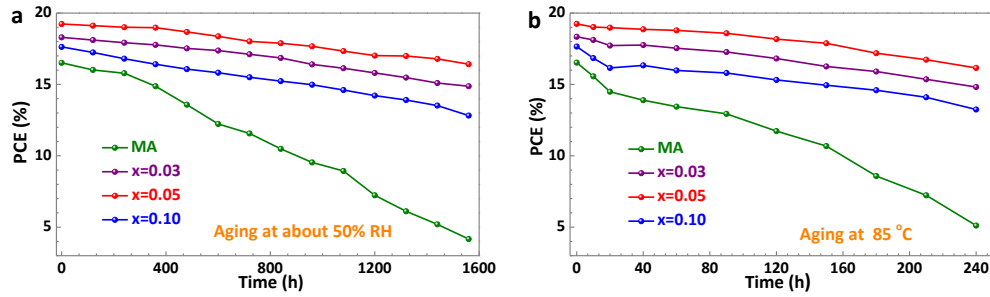

**Fig. S6.** PCE variation curves of unsealed MAPbI<sub>3</sub> and [(BE<sub>2</sub>PbI<sub>4</sub>)<sub>x</sub>(FA<sub>0.9</sub>Cs<sub>0.1</sub>PbI<sub>3</sub>)<sub>1-x</sub>]<sub>0.85</sub>(FAPbBr<sub>3</sub>)<sub>0.15</sub> (x=0.03, 0.05, 0.10) perovskite devices when exposing to (a) 50% RH for 1600 h and (b) 85 °C for 240 h.

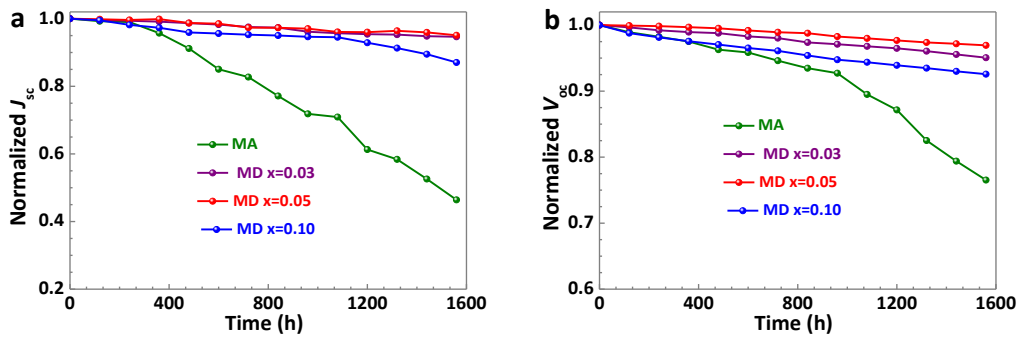

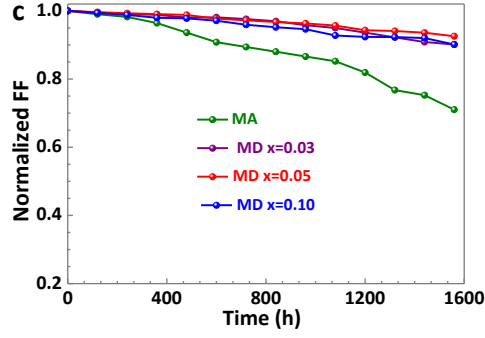

**Fig. S7.** Normalized (a) short-circuit current density ( $J_{sc}$ ), (b) open circuit voltages ( $V_{oc}$ ) and (c) fill factor (FF) variation curves of unsealed MAPbI<sub>3</sub> and [(BE<sub>2</sub>PbI<sub>4</sub>)<sub>x</sub>(FA<sub>0.9</sub>Cs<sub>0.1</sub>PbI<sub>3</sub>)<sub>1-x</sub>]<sub>0.85</sub>(FAPbBr<sub>3</sub>)<sub>0.15</sub> ( $x=0.03, 0.05, 0.10$ ) perovskite devices under about 50% RH.

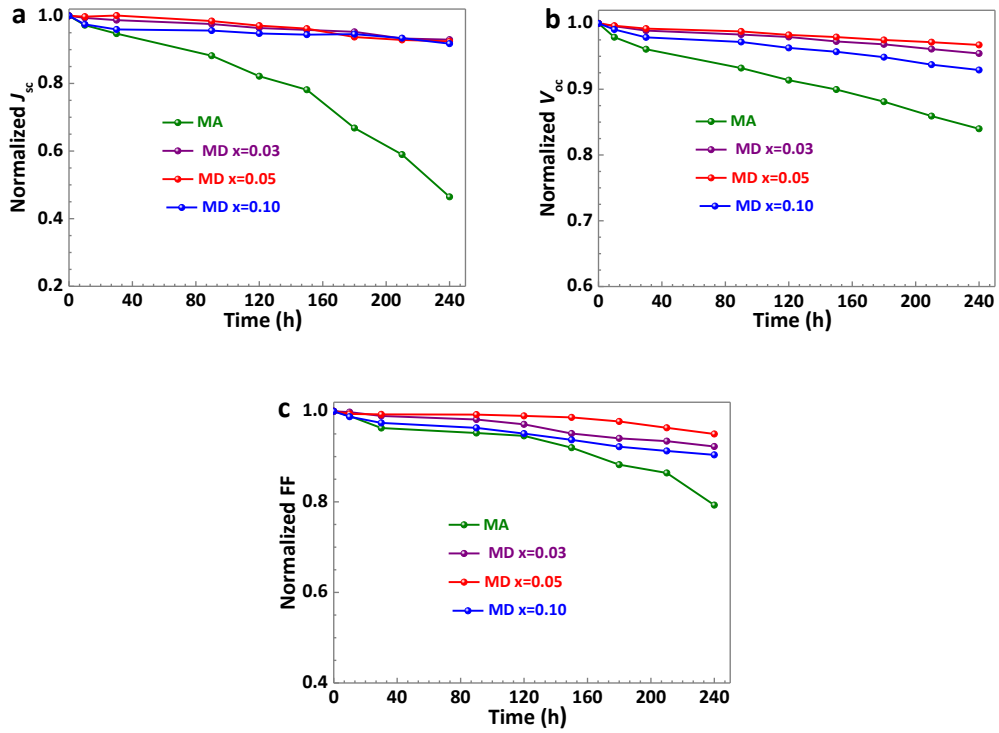

**Fig. S8.** Normalized (a) short-circuit current density ( $J_{sc}$ ), (b) open circuit voltages ( $V_{oc}$ ) and (c) fill factor (FF) variation curves of unsealed MAPbI<sub>3</sub> and [(BE<sub>2</sub>PbI<sub>4</sub>)<sub>x</sub>(FA<sub>0.9</sub>Cs<sub>0.1</sub>PbI<sub>3</sub>)<sub>1-x</sub>]<sub>0.85</sub>(FAPbBr<sub>3</sub>)<sub>0.15</sub> ( $x=0.03, 0.05, 0.10$ ) perovskite devices at 85 °C.

**Table S1.** Photovoltaic parameters of the MAPbI<sub>3</sub> and the MD (x=0.05) perovskite devices under reverse and forward scan directions.

| Device     | $J_{sc}$ (mA cm <sup>-2</sup> ) | $V_{oc}$ (V) | FF (%) | PCE (%) |
|------------|---------------------------------|--------------|--------|---------|
| MA-Reverse | 21.49                           | 1.07         | 71.67  | 16.53   |
| MA-Forward | 20.18                           | 1.07         | 68.74  | 14.86   |
| MD-Reverse | 22.79                           | 1.10         | 76.74  | 19.24   |
| MD-Forward | 22.38                           | 1.10         | 75.80  | 18.69   |

**Table S2.** Photovoltaic parameters of [(BE<sub>2</sub>PbI<sub>4</sub>)<sub>x</sub>(FA<sub>0.9</sub>Cs<sub>0.1</sub>PbI<sub>3</sub>)<sub>1-x</sub>]<sub>0.85</sub>(FAPbBr<sub>3</sub>)<sub>0.15</sub> (x=0.15, 0.20, 0.25) PSCs.

| Device | $J_{sc}$ (mA cm <sup>-2</sup> ) | $V_{oc}$ (V) | FF (%) | PCE (%) |
|--------|---------------------------------|--------------|--------|---------|
| x=0.15 | 20.38                           | 1.10         | 73.07  | 16.31   |
| x=0.20 | 18.69                           | 1.06         | 71.67  | 14.16   |
| x=0.25 | 17.55                           | 1.05         | 61.94  | 11.38   |

**Table S3.** Photovoltaic parameters of [(BE<sub>2</sub>PbI<sub>4</sub>)<sub>x</sub>(FA<sub>0.9</sub>Cs<sub>0.1</sub>PbI<sub>3</sub>)<sub>1-x</sub>]<sub>0.85</sub>(FAPbBr<sub>3</sub>)<sub>0.15</sub> (x=0.15, 0.20, 0.25) PSCs for humidity stability measurements under about 50% RH.

| MAPbI <sub>3</sub> | $J_{sc}$ (mA cm <sup>-2</sup> ) | $V_{oc}$ (V) | FF (%) | PCE (%) |
|--------------------|---------------------------------|--------------|--------|---------|
| 0 h                | 21.49                           | 1.07         | 71.67  | 16.51   |
| 120 h              | 21.33                           | 1.06         | 70.96  | 16.02   |



|             |                                 |              |        |         |
|-------------|---------------------------------|--------------|--------|---------|
| 240 h       | 21.27                           | 1.05         | 70.39  | 15.79   |
| 360 h       | 20.57                           | 1.05         | 69.09  | 14.87   |
| 480 h       | 19.59                           | 1.03         | 67.09  | 13.58   |
| 600 h       | 18.27                           | 1.03         | 65.08  | 12.23   |
| 720 h       | 17.78                           | 1.02         | 64.08  | 11.57   |
| 840 h       | 16.58                           | 1.00         | 63.08  | 10.49   |
| 960 h       | 15.44                           | 0.99         | 62.07  | 9.53    |
| 1080 h      | 15.23                           | 0.96         | 61.07  | 8.94    |
| 1200 h      | 13.17                           | 0.93         | 58.70  | 7.23    |
| 1320 h      | 12.55                           | 0.89         | 55.01  | 6.11    |
| 1440 h      | 11.30                           | 0.85         | 53.94  | 5.19    |
| 1560 h      | 9.97                            | 0.82         | 50.90  | 4.17    |
|             |                                 |              |        |         |
| MD (x=0.03) | $J_{sc}$ (mA cm <sup>-2</sup> ) | $V_{oc}$ (V) | FF (%) | PCE (%) |
| 0 h         | 22.83                           | 1.09         | 73.63  | 18.30   |
| 120 h       | 22.74                           | 1.09         | 73.27  | 18.11   |
| 240 h       | 22.68                           | 1.08         | 72.99  | 17.92   |
| 360 h       | 22.62                           | 1.08         | 72.77  | 17.77   |
| 480 h       | 22.52                           | 1.08         | 72.18  | 17.52   |
| 600 h       | 22.43                           | 1.07         | 72.23  | 17.37   |

|        |       |      |       |       |
|--------|-------|------|-------|-------|
| 720 h  | 22.26 | 1.07 | 71.87 | 17.12 |
| 840 h  | 22.22 | 1.06 | 71.39 | 16.86 |
| 960 h  | 21.95 | 1.06 | 70.53 | 16.40 |
| 1080 h | 21.85 | 1.06 | 69.94 | 16.14 |
| 1200 h | 21.78 | 1.05 | 68.92 | 15.81 |
| 1320 h | 21.75 | 1.05 | 67.91 | 15.48 |
| 1440 h | 21.64 | 1.04 | 66.89 | 15.10 |
| 1560 h | 21.61 | 1.04 | 66.37 | 14.87 |

| MD (x=0.05) | $J_{sc}$ (mA cm <sup>-2</sup> ) | $V_{oc}$ (V) | FF (%) | PCE (%) |
|-------------|---------------------------------|--------------|--------|---------|
| 0 h         | 22.77                           | 1.10         | 76.74  | 19.23   |
| 120 h       | 22.73                           | 1.10         | 76.44  | 19.12   |
| 240 h       | 22.68                           | 1.10         | 76.20  | 19.01   |
| 360 h       | 22.74                           | 1.10         | 76.01  | 18.98   |
| 480 h       | 22.48                           | 1.10         | 75.82  | 18.68   |
| 600 h       | 22.43                           | 1.09         | 74.98  | 18.37   |
| 720 h       | 22.17                           | 1.09         | 74.61  | 18.02   |
| 840 h       | 22.16                           | 1.09         | 74.22  | 17.89   |
| 960 h       | 22.10                           | 1.08         | 73.91  | 17.67   |
| 1080 h      | 21.88                           | 1.08         | 73.42  | 17.33   |

|             |                                 |              |        |         |
|-------------|---------------------------------|--------------|--------|---------|
| 1200 h      | 21.86                           | 1.08         | 72.38  | 17.02   |
| 1320 h      | 21.95                           | 1.07         | 72.20  | 16.99   |
| 1440 h      | 21.85                           | 1.07         | 71.82  | 16.79   |
| 1560 h      | 21.65                           | 1.07         | 71.02  | 16.42   |
|             |                                 |              |        |         |
| MD (x=0.10) | $J_{sc}$ (mA cm <sup>-2</sup> ) | $V_{oc}$ (V) | FF (%) | PCE (%) |
| 0 h         | 21.71                           | 1.12         | 72.57  | 17.63   |
| 120 h       | 21.61                           | 1.11         | 72.12  | 17.24   |
| 240 h       | 21.32                           | 1.10         | 71.71  | 16.80   |
| 360 h       | 21.13                           | 1.09         | 71.10  | 16.41   |
| 480 h       | 20.83                           | 1.09         | 70.98  | 16.07   |
| 600 h       | 20.76                           | 1.08         | 70.47  | 15.82   |
| 720 h       | 20.68                           | 1.08         | 69.62  | 15.50   |
| 840 h       | 20.63                           | 1.07         | 69.09  | 15.23   |
| 960 h       | 20.55                           | 1.06         | 68.67  | 14.98   |
| 1080 h      | 20.52                           | 1.06         | 67.33  | 14.61   |
| 1200 h      | 20.17                           | 1.05         | 67.02  | 14.22   |
| 1320 h      | 19.82                           | 1.05         | 66.99  | 13.91   |
| 1440 h      | 19.43                           | 1.04         | 66.79  | 13.52   |
| 1560 h      | 18.90                           | 1.04         | 65.42  | 12.82   |

**Table S4.** Photovoltaic parameters of  $[(\text{BE}_2\text{PbI}_4)_x(\text{FA}_{0.9}\text{Cs}_{0.1}\text{PbI}_3)_{1-x}]_{0.85}(\text{FAPbBr}_3)_{0.15}$  ( $x=0.15, 0.20, 0.25$ ) PSCs for heat stability measurements 85 °C.

| MAPbI <sub>3</sub> | $J_{\text{sc}}$ (mA cm <sup>-2</sup> ) | $V_{\text{oc}}$ (V) | FF (%) | PCE (%) |
|--------------------|----------------------------------------|---------------------|--------|---------|
| 0                  | 21.48                                  | 1.07                | 71.67  | 16.53   |
| 10                 | 20.89                                  | 1.05                | 70.92  | 15.57   |
| 20                 | 20.35                                  | 1.03                | 69.02  | 14.49   |
| 40                 | 19.77                                  | 1.02                | 68.89  | 13.89   |
| 60                 | 19.39                                  | 1.01                | 68.56  | 13.44   |
| 90                 | 18.95                                  | 1.00                | 68.23  | 12.94   |
| 120                | 17.64                                  | 0.98                | 67.78  | 11.73   |
| 150                | 16.78                                  | 0.97                | 65.91  | 10.68   |
| 180                | 14.35                                  | 0.95                | 63.22  | 8.58    |
| 210                | 12.67                                  | 0.92                | 61.91  | 7.23    |
| 240                | 9.98                                   | 0.90                | 56.82  | 5.11    |
| MD ( $x=0.03$ )    | $J_{\text{sc}}$ (mA cm <sup>-2</sup> ) | $V_{\text{oc}}$ (V) | FF (%) | PCE (%) |
| 0                  | 22.83                                  | 1.09                | 73.63  | 18.34   |
| 10                 | 22.67                                  | 1.09                | 73.50  | 18.12   |
| 20                 | 22.53                                  | 1.08                | 72.87  | 17.72   |
| 40                 | 22.64                                  | 1.08                | 72.61  | 17.76   |

|     |       |      |       |       |
|-----|-------|------|-------|-------|
| 60  | 22.41 | 1.07 | 72.37 | 17.54 |
| 90  | 22.27 | 1.07 | 72.29 | 17.27 |
| 120 | 22.00 | 1.07 | 71.51 | 16.81 |
| 150 | 21.87 | 1.06 | 70.02 | 16.26 |
| 180 | 21.74 | 1.06 | 69.23 | 15.90 |
| 210 | 21.29 | 1.05 | 68.77 | 15.36 |
| 240 | 21.22 | 1.04 | 67.90 | 14.82 |

| MD (x=0.05) | $J_{sc}$ (mA cm <sup>-2</sup> ) | $V_{oc}$ (V) | FF (%) | PCE (%) |
|-------------|---------------------------------|--------------|--------|---------|
| 0           | 22.77                           | 1.10         | 76.74  | 19.24   |
| 10          | 22.72                           | 1.10         | 76.29  | 19.02   |
| 20          | 22.79                           | 1.09         | 76.21  | 18.98   |
| 40          | 22.70                           | 1.09         | 76.22  | 18.86   |
| 60          | 22.62                           | 1.09         | 76.20  | 18.79   |
| 90          | 22.42                           | 1.09         | 76.18  | 18.58   |
| 120         | 22.11                           | 1.08         | 75.97  | 18.18   |
| 150         | 21.91                           | 1.08         | 75.70  | 17.89   |
| 180         | 21.34                           | 1.07         | 75.01  | 17.19   |
| 210         | 21.15                           | 1.07         | 73.94  | 16.73   |
| 240         | 21.05                           | 1.07         | 72.89  | 16.16   |

| MD (x=0.10) | $J_{sc}$ (mA cm <sup>-2</sup> ) | $V_{oc}$ (V) | FF (%) | PCE (%) |
|-------------|---------------------------------|--------------|--------|---------|
| 0           | 21.71                           | 1.12         | 72.57  | 17.65   |
| 10          | 21.16                           | 1.11         | 71.70  | 16.84   |
| 20          | 20.83                           | 1.10         | 70.71  | 16.16   |
| 40          | 21.14                           | 1.09         | 70.84  | 16.33   |
| 60          | 20.92                           | 1.09         | 70.09  | 15.98   |
| 90          | 20.76                           | 1.09         | 69.91  | 15.80   |
| 120         | 20.58                           | 1.08         | 68.99  | 15.31   |
| 150         | 20.50                           | 1.07         | 67.99  | 14.94   |
| 180         | 20.53                           | 1.06         | 66.89  | 14.60   |
| 210         | 20.28                           | 1.05         | 66.21  | 14.10   |
| 240         | 19.92                           | 1.04         | 65.58  | 13.25   |
